# Supplementary material
Source: PubMed Central journal article supplement (PMC3039354)
Supplement: supp_M110.192104_jbc.M110.192104-1.pdf [file supp_M110.192104_jbc.M110.192104-1.pdf]

SUPPLEMENTAL FIGURES

Fig. S1. **Cre-mediated recombination of floxed *Pcsk5* and *Furin* alleles is restricted to liver.** DNA was extracted from different tissues of [Fur-PC5/6]hKO mice and subjected to PCR analysis using specific pairs of primers (see Table 1). Note that the  $\Delta 1$  and  $\Delta 2$  amplicons were detected in the liver only.

Fig.S2. **No significant difference was observed in the body weight (A) or relative liver weight (B) of hKO mice.** Mean  $\pm$  SD are shown and n = 7 to 13 males or females of 3 months of age.

Fig.S3. **No gross abnormalities were observed in livers from hKO mice.** Hematoxylin and eosin-stained paraffin sections (4  $\mu$ m thick) of livers from WT (upper panels) and PC5/6-hKO, Fur-hKO and [Fur-PC5/6]hKO (lower panels) are shown. Bars = 20  $\mu$ m.

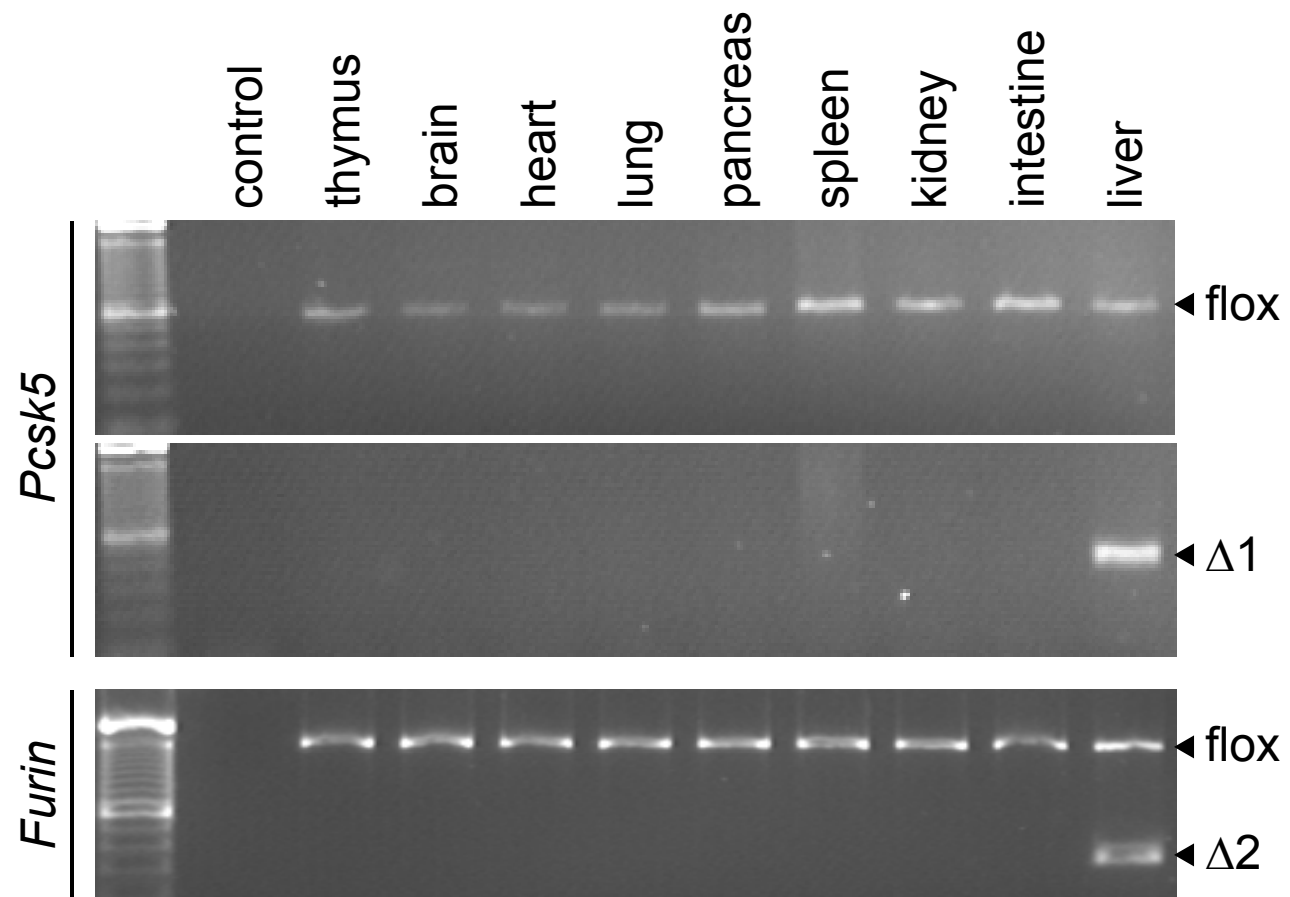

Supplemental Figure S1

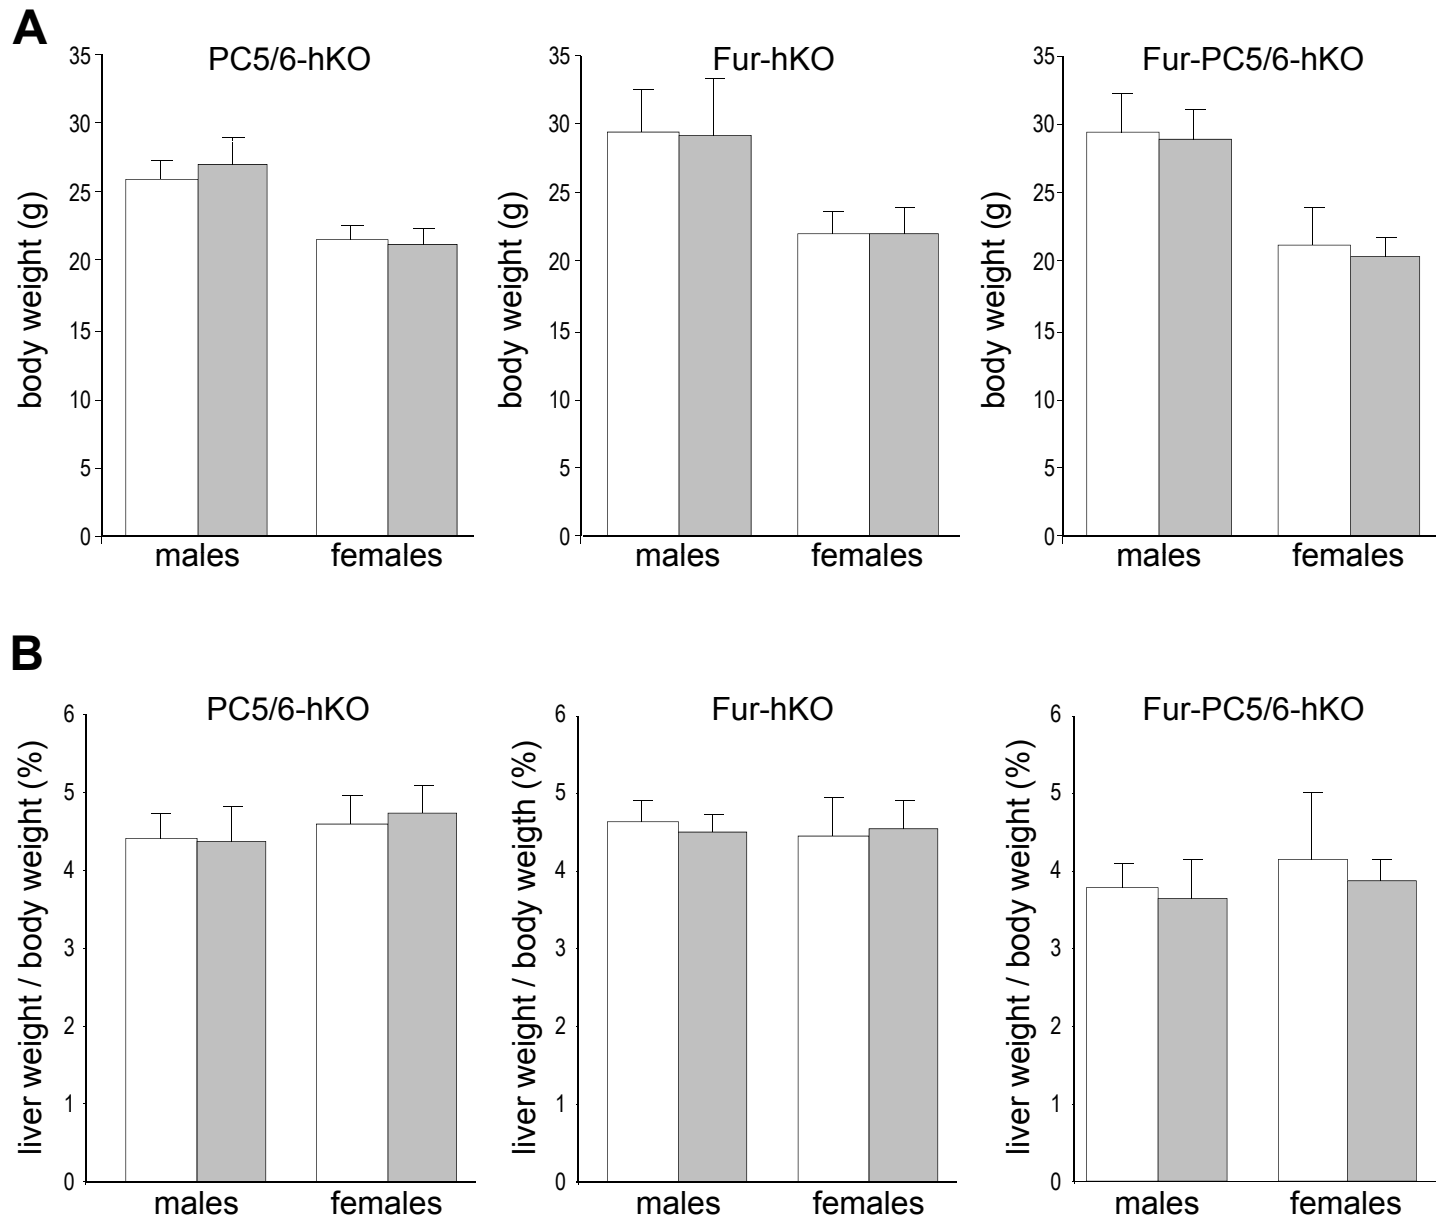

Supplemental Figure S2

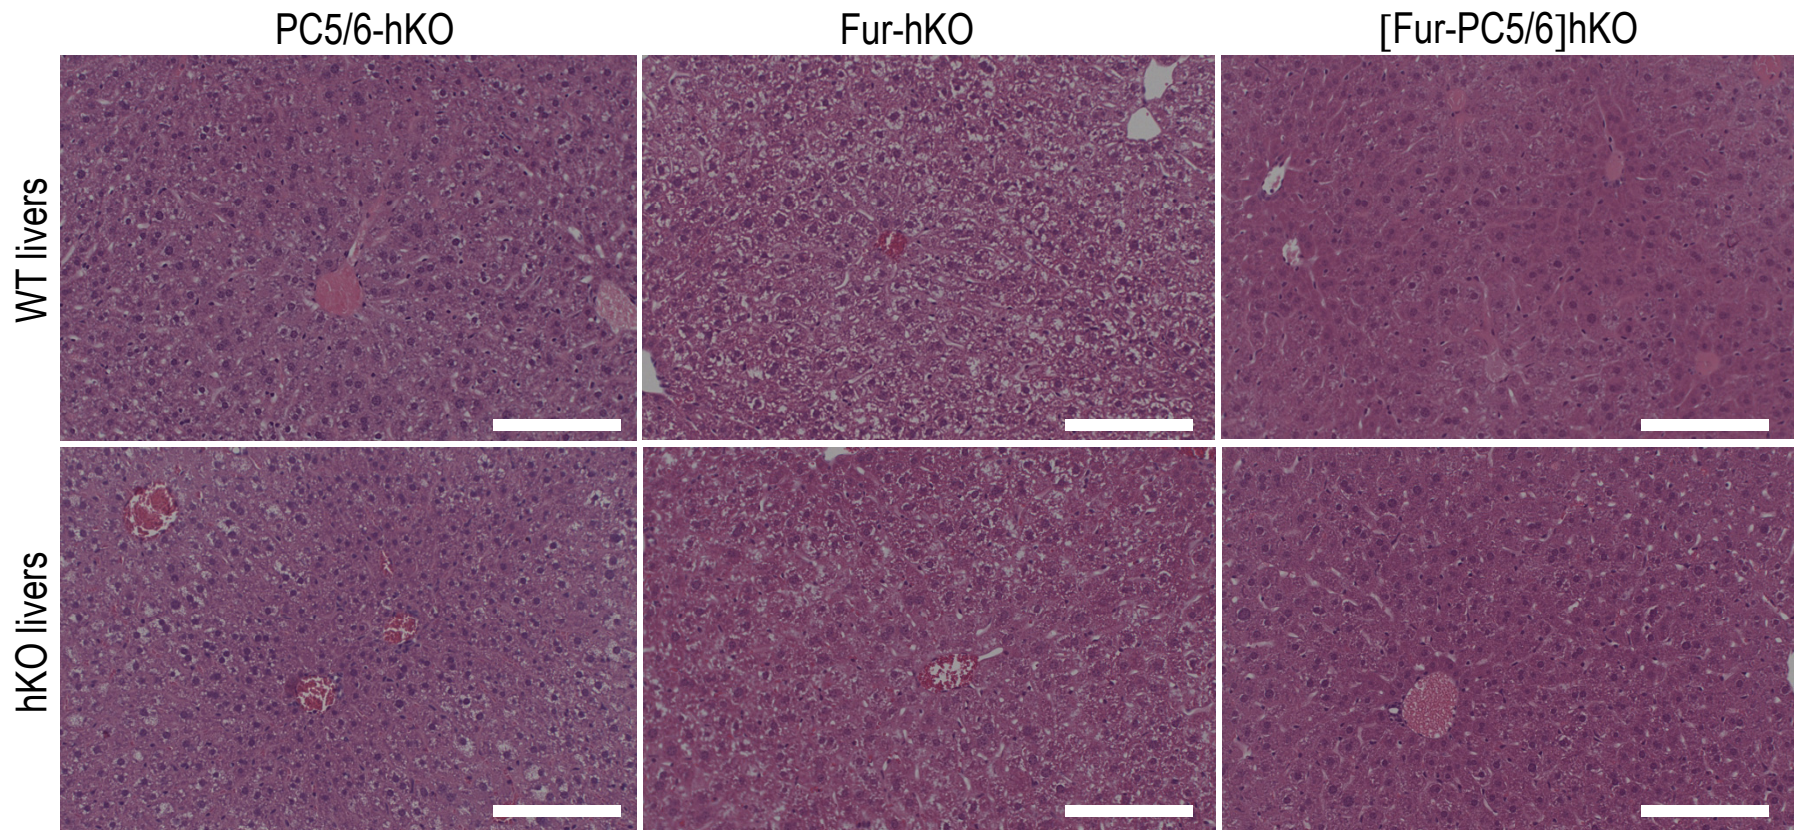

Supplemental Figure S3
